# Supplementary material for: Estimation of maize above-ground biomass based on stem-leaf separation strategy integrated with LiDAR and optical remote sensing data
Source: PeerJ. 2019 Sep 17;7:e7593. doi: 10.7717/peerj.7593 (PMC6753932; doi:10.7717/peerj.7593)
Supplement: Supplemental Information 5 [file peerj-07-7593-s005.xlsx]

## Sheet: Sheet1
NGRDI	SRVI	AGLB
0.256785	1.73705	175.96
0.181518	1.16188	52.2453
0.301743	2.22365	217.017
0.18909	1.44217	71.6387
0.303949	2.46079	147.936
0.19735	1.51541	77.1493
0.319504	2.4112	139.717
0.190717	1.18695	59.7244
0.289654	2.41157	143.915
0.211237	1.34887	65.6969
0.283371	2.47241	130.423
0.132978	0.580514	19.5147
0.250193	1.78385	110.009
0.181062	0.607182	19.5147
0.290968	2.33522	137.511
0.130973	0.727732	19.0933
0.327464	2.68597	126.44
0.12595	0.635459	19.0933
0.308283	2.62475	113.36
0.177704	0.623243	20.2653
0.25657	2.22014	94.8053
0.193099	0.601127	20.2653
0.291133	2.642	103.424
0.200049	1.34789	91.2853
0.241352	1.86256	121.714
0.252289	1.97615	73.88
0.29011	2.29953	103.432
0.245244	1.78031	92.5013
0.262157	2.14363	115.627
0.17921	0.982089	39.184
