# Supplementary material for: Estimation of maize above-ground biomass based on stem-leaf separation strategy integrated with LiDAR and optical remote sensing data
Source: PeerJ. 2019 Sep 17;7:e7593. doi: 10.7717/peerj.7593 (PMC6753932; doi:10.7717/peerj.7593)
Supplement: Supplemental Information 8 [file peerj-07-7593-s008.xlsx]

## Sheet: Sheet1
H_sd	H_mean	H_cv	H_max	AGSB
0.124379	2.24979	0.0552845	2.51902	465.933
0.098189	2.05608	0.0477553	2.2355	127.961
0.125081	2.20912	0.0573997	2.48764	574.651
0.118702	1.98024	0.0599432	2.18635	202.84
0.0924552	2.10453	0.0439315	2.31811	316.048
0.113915	1.98495	0.0573892	2.22358	218.444
0.105479	2.02939	0.0519758	2.20563	298.49
0.104759	1.95273	0.0587635	2.08869	161.022
0.0839904	1.9543	0.0429773	2.09975	273.373
0.14854	2.02223	0.0784998	2.30153	177.124
0.102907	2.16265	0.0475836	2.34842	301.653
0.166971	1.86793	0.0893885	2.16246	75.692
0.0822812	2.26271	0.0363641	2.41944	411.244
0.130352	1.86111	0.0700402	2.06381	75.692
0.0816013	2.38583	0.0378515	2.45068	514.056
0.10249	1.85906	0.0606789	2.20322	54.8924
0.102471	2.1382	0.0479239	2.32687	301.716
0.0416028	1.90302	0.0251677	2.1859	54.8924
0.12039	2.10015	0.0573244	2.33192	270.504
0.105001	1.95225	0.0606155	2.15322	58.5693

## Sheet: Sheet2
H_sd	H_mean	H_cv	H_max	AGSB
0.110285	1.97667	0.0557934	2.15616	189.18
0.109512	1.97746	0.0595999	2.02268	58.5693
0.0638611	1.97674	0.0323063	2.08993	206.379
0.138479	2.10832	0.0656819	2.28216	327.664
0.107592	2.16905	0.0496032	2.3574	436.885
0.0865977	2.08458	0.041542	2.20817	182.253
0.0885412	2.07065	0.0427601	2.23064	255.155
0.132208	1.88545	0.07164	2.16378	193.899
0.122193	1.97591	0.0618413	2.18916	242.373
0.0757234	1.96108	0.0386132	2.14697	95.9707
