# Supplementary material for: Estimation of maize above-ground biomass based on stem-leaf separation strategy integrated with LiDAR and optical remote sensing data
Source: PeerJ. 2019 Sep 17;7:e7593. doi: 10.7717/peerj.7593 (PMC6753932; doi:10.7717/peerj.7593)
Supplement: Supplemental Information 10 [file peerj-07-7593-s010.xlsx]

## Sheet: Sheet1
CIgreen	CVI	EVI2	GI	MTVI2	NDVI	NGRDI	OSAVI	SAVI	SRVI	AGLB
0.277245	0.65768	0.602215	1.80068	-3446.46	0.331185	0.256785	0.328545	0.486984	1.73705	175.96
0.181689	0.554612	0.575684	1.79647	-3093.01	0.311825	0.181518	0.308346	0.471744	1.16188	52.2453
0.307262	0.641965	0.736401	1.9713	-3094.85	0.388433	0.301743	0.345554	0.551925	2.22365	217.017
0.161253	0.577138	0.601326	1.80122	-2895.19	0.323744	0.18909	0.320077	0.48258	1.44217	71.6387
0.306736	0.651755	0.781779	2.05839	-2982.26	0.396949	0.303949	0.344074	0.542315	2.46079	147.936
0.190922	0.590143	0.603048	1.77764	-2945.34	0.324841	0.19735	0.312727	0.522303	1.51541	77.1493
0.31869	0.656087	0.809786	2.11818	-3110.27	0.420231	0.319504	0.351568	0.518084	2.4112	139.717
0.206621	0.630225	0.598411	1.77284	-3095.13	0.312967	0.190717	0.300868	0.420738	1.18695	59.7244
0.402949	0.760479	0.730608	1.93804	-3272.81	0.412378	0.283371	0.375129	0.557533	2.47241	130.423
0.20176	0.637611	0.611198	1.79531	-2897.59	0.323906	0.211237	0.320481	0.47003	1.34887	65.6969
0.368374	0.724	0.733207	2.02006	-3144.35	0.413549	0.289654	0.341088	0.614712	2.41157	143.915
0.0632385	0.473429	0.335695	1.60186	-3373.93	0.181252	0.132978	0.262397	0.33324	0.580514	19.5147
0.254434	0.626659	0.575504	1.83567	-3016.56	0.343736	0.250193	0.34229	0.50699	1.78385	110.009
0.0759132	0.483365	0.36865	1.6753	-2778.97	0.200291	0.181062	0.284317	0.307827	0.607182	19.5147
0.301815	0.633902	0.692088	1.95749	-3038.83	0.394062	0.290968	0.35079	0.586442	2.33522	137.511
0.0760019	0.518805	0.457225	1.71297	-3251.81	0.258172	0.130973	0.24775	0.349528	0.727732	19.0933
0.316554	0.628949	0.797269	2.08823	-3031.66	0.408729	0.327464	0.378503	0.594394	2.68597	126.44
0.0602197	0.517837	0.389961	1.64072	-2907.37	0.210539	0.12595	0.196873	0.348834	0.635459	19.0933
0.36374	0.660205	0.782946	1.9967	-3020.68	0.397684	0.308283	0.35902	0.608809	2.62475	113.36
0.145969	0.574585	0.424554	1.706	-2839.62	0.267154	0.177704	0.239609	0.305685	0.623243	20.2653

## Sheet: Sheet2
CIgreen	CVI	EVI2	GI	MTVI2	NDVI	NGRDI	OSAVI	SAVI	SRVI	AGLB
0.349896	0.72362	0.752735	1.92153	-3133.17	0.388512	0.25657	0.356804	0.61684	2.22014	94.8053
0.117984	0.572855	0.349421	1.62666	-3087.14	0.227383	0.193099	0.248306	0.245571	0.601127	20.2653
0.42093	0.721395	0.776163	1.99745	-3062.65	0.422242	0.291133	0.378051	0.583625	2.642	103.424
0.184651	0.623234	0.550384	1.71441	-3111.37	0.300104	0.200049	0.301942	0.506828	1.34789	91.2853
0.258922	0.605116	0.705288	1.85032	-3089.15	0.369065	0.241352	0.359014	0.55408	1.86256	121.714
0.235646	0.601505	0.718629	1.90262	-3014.72	0.366379	0.252289	0.350074	0.543487	1.97615	73.88
0.28902	0.625712	0.73545	1.93343	-3077.26	0.381792	0.29011	0.366597	0.577504	2.29953	103.432
0.272247	0.677656	0.710772	1.92431	-3146.55	0.367165	0.245244	0.348343	0.572661	1.78031	92.5013
0.318448	0.680879	0.75117	1.93731	-3088.31	0.38817	0.262157	0.302662	0.519605	2.14363	115.627
0.1138	0.559318	0.438435	1.63853	-3134.26	0.239246	0.17921	0.238256	0.420418	0.982089	39.184
